# Supplementary material for: Stimulation of Insect Herbivory by Elevated Temperature Outweighs Protection by the Jasmonate Pathway
Source: MDPI journal article supplement (doi:10.3390/plants9020172), 2020-02-01
Supplement: s1 [file s1]

## Supplementary materials for Havko et al.

### Stimulation of insect herbivory by elevated temperature outweighs protection by the jasmonate pathway

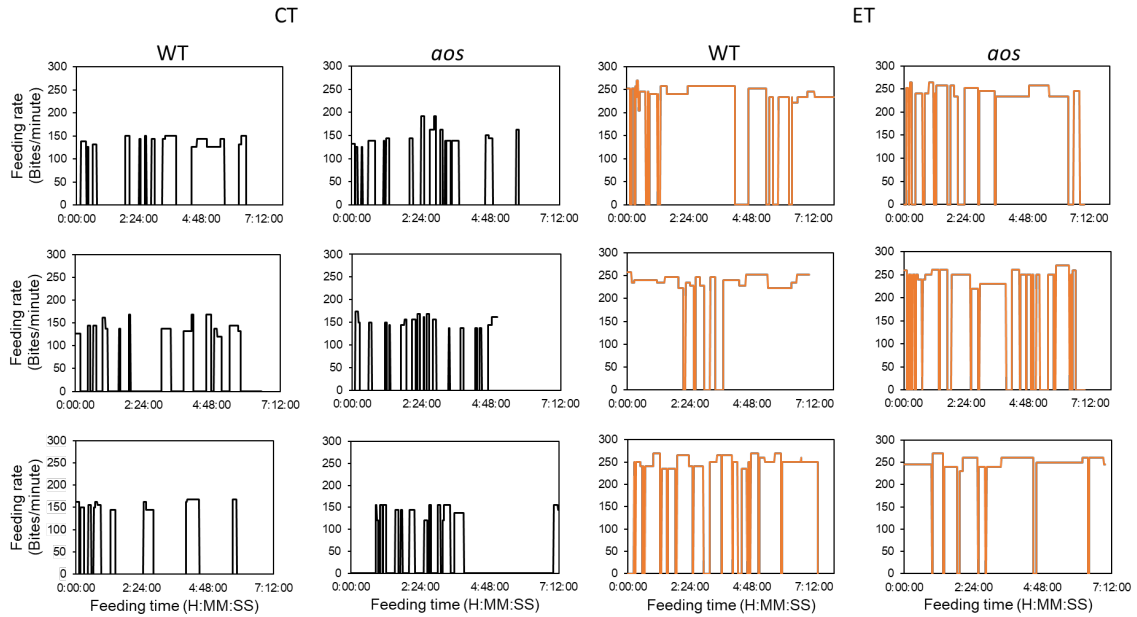

**Figure S1.** *T. ni* larvae spend more time feeding and feed faster at elevated temperature. WT and *aos* mutant plants were grown continuously at CT for 8 weeks and then transferred to CT or ET treatment chambers. Following a 24-h acclimation period in the treatment chamber, plants were challenged with *T. ni* larvae that had been reared on the WT for at least 7 days to a weight of approximately 35 mg. Within the treatment chambers, larvae were allowed to feed for 24-h prior to video monitoring. Data show traces of the activity of each individual larvae monitored. Slow motion was used to facilitate counts of bites when necessary.

| Rank | Protein Annotation                                                           | Accession Number | Fold change ET/CT |
|------|------------------------------------------------------------------------------|------------------|-------------------|
| 1    | Leucine-rich repeat (LRR) family protein                                     | AT3G24480.1      | 3.62              |
| 2    | BiP1, Heat shock protein 70 (Hsp 70) family protein                          | AT5G28540.1      | 2.75              |
| 3    | CYN, Cyanase                                                                 | AT3G23490.1      | 2.36              |
| 4    | Leucine-rich repeat (LRR) family protein                                     | AT4G18670.1      | 1.96              |
| 5    | RD21, Granulin repeat cysteine protease family protein                       | AT1G47128.1      | 1.90              |
| 6    | CSY1, Citrate synthase 1                                                     | AT3G58740.1      | 1.89              |
| 7    | RmlC-like cupins superfamily protein                                         | AT3G05950.1      | 1.79              |
| 8    | Histone superfamily protein                                                  | AT1G07602.2      | 1.69              |
| 9    | ATPER4, Feritin 4                                                            | AT2G04300.1      | 1.63              |
| 10   | Thioesterase superfamily protein                                             | AT2G22230.1      | 1.63              |
| 11   | CSD2, copper/zinc superoxide dismutase 2                                     | AT2G28190.1      | 1.59              |
| 12   | Myosin heavy chain-related                                                   | AT5G61200.1      | 1.56              |
| 13   | DPP6 N-terminal domain-like protein                                          | AT1G21680.1      | 1.56              |
| 14   | TIP2, Tonoplast intrinsic protein 2                                          | AT3G26520.1      | 1.55              |
| 15   | TIP2, Tonoplast intrinsic protein                                            | AT4G17340.1      | 1.54              |
| 16   | ATPB, ATP synthase subunit beta                                              | ATCG00480.1      | 1.50              |
| 17   | VDAC1, Voltage dependent anion channel                                       | AT3G01280.1      | 1.49              |
| 18   | Glucose-methanol-choline oxidoreductase family protein                       | AT3G56980.1      | 1.49              |
| 19   | Xanthine/uracil permease family protein                                      | AT5G62890.1      | 1.49              |
| 20   | LHCb2.2, photosystem II light harvesting complex                             | AT2G05070.1      | 1.49              |
| 21   | ATEXLB1                                                                      | AT4G17030.1      | 1.43              |
| 22   | ATSBT3.5, Subtilase family protein                                           | AT1G32940.1      | 1.42              |
| 23   | Pectin lyase-like superfamily protein                                        | AT3G57790.1      | 1.42              |
| 24   | ATAMT2, Ammonium transporter 2                                               | AT2G38290.1      | 1.38              |
| 25   | Protein of unknown function (DUF567)                                         | AT5G01750.1      | 1.38              |
| 26   | Polynucleotidyl transferase, ribonuclease H-like superfamily protein         | AT3G11770.1      | 1.36              |
| 27   | AAO3, Abscissa aldehyde oxidase 3                                            | AT2G27150.1      | 1.33              |
| 28   | Protein of unknown function, DUF642                                          | AT5G11420.1      | 1.32              |
| 29   | RD20, Calceosin-related family protein                                       | AT2G33380.1      | 1.31              |
| 30   | PyR4, Pyrimidin 4                                                            | AT4G22930.1      | 1.30              |
| 31   | Leucine-rich repeat protein kinase family protein                            | AT5G56980.1      | 1.30              |
| 32   | PSBD Photosystem II reaction center protein D                                | ATCG00270.1      | 1.30              |
| 33   | Zn-dependent exopeptidases superfamily protein                               | AT5G60160.1      | 1.29              |
| 34   | FAD-binding berberine family protein                                         | AT4G20860.1      | 1.29              |
| 35   | Glyoxaldehyde 3-phosphate dehydrogenase A subunit                            | AT3G26950.1      | 1.28              |
| 36   | FAD-binding berberine family protein                                         | AT1G26390.1      | 1.27              |
| 37   | Glycosyl hydrolase family protein with chitinase insertion domain            | AT4G19810.1      | 1.27              |
| 38   | Cell wall, plant-type cell wall protein                                      | AT1G21670.1      | 1.26              |
| 39   | Receptor-like protein kinase-related family protein                          | AT5G48540.1      | 1.26              |
| 40   | GGT1 Gamma-glutamyl transpeptidase 1                                         | AT4G39640.1      | 1.24              |
| 41   | BNR/Asp-box repeat family protein                                            | AT5G57700.1      | 1.23              |
| 42   | mMDH1, Lactate/malate dehydrogenase family protein                           | AT1G53240.1      | 1.21              |
| 43   | SBPASE, Sedochlorella-bisphosphatase                                         | AT3G55800.1      | 1.21              |
| 44   | DHAR1, Dehydroascorbate reductase                                            | AT1G19570.1      | 1.21              |
| 45   | UCC2 Uridacyanin 2                                                           | AT2G44790.1      | 1.21              |
| 46   | HOT5                                                                         | AT5G43940.1      | 1.21              |
| 47   | FIB4, Plastid-lipid associated protein PAP / fibrillin family protein        | AT3G23400.1      | 1.18              |
| 48   | Arginase/deoxyase superfamily protein                                        | AT4G08870.1      | 1.18              |
| 49   | LHCb3, Light-harvesting chlorophyll B-binding protein 3                      | AT5G54270.1      | 1.18              |
| 50   | GAPB, Glyoxaldehyde-3-phosphate dehydrogenase B subunit                      | AT1G42970.1      | 1.16              |
| 51   | LOX2, Lipoxygenase 2                                                         | AT3G45140.1      | 1.15              |
| 52   | FAD-binding berberine family protein                                         | AT2G34810.1      | 1.15              |
| 53   | SS2 Stridolase synthase 2                                                    | AT1G74020.1      | 1.14              |
| 54   | CAR8, Carbamoyl phosphate synthetase B                                       | AT1G29900.1      | 1.13              |
| 55   | Peptidase M1 family protein                                                  | AT1G63770.1      | 1.13              |
| 56   | GLP5, Germ-line protein 5                                                    | AT1G09560.1      | 1.13              |
| 57   | UVR8, Regulator of chromosome condensation (RCC1) family protein             | AT5G36860.1      | 1.12              |
| 58   | ATP-dependent Clp protease                                                   | AT1G33360.1      | 1.11              |
| 59   | AIR12 Auxin-responsive family protein                                        | AT3G07390.1      | 1.11              |
| 60   | Glycosyl hydrolase family 38 protein                                         | AT3G28720.1      | 1.10              |
| 61   | ATCWMV1, Glycosyl hydrolases family 32 protein                               | AT3G13790.1      | 1.10              |
| 62   | LIN2, Coproporphyrinogen III oxidase                                         | AT1G03475.1      | 1.10              |
| 63   | GLP3, Germin 3                                                               | AT5G20630.1      | 1.09              |
| 64   | D-mannose binding lectin protein with Apple-like carbohydrate-binding domain | AT1G78850.1      | 1.08              |
| 65   | ARA12, Subtilase family protein                                              | AT4G36730.1      | 1.05              |
| 66   | Glycosyl hydrolase family 38 protein                                         | AT5G13880.1      | 1.05              |
| 67   | HSP60-2 Heat shock protein 60-2                                              | AT2G33210.1      | 1.03              |
| 68   | Alkaline-phosphatase-like family protein                                     | AT4G29680.1      | 1.03              |
| 69   | Ribosomal protein S27a                                                       | AT1G23410.1      | 1.03              |
| 70   | Polyketide cyclase/dehydrase and lipid transport superfamily protein         | AT4G22670.1      | 1.03              |
| 71   | PSB8, Photosystem II reaction center protein B                               | ATCG00690.1      | 1.01              |
| 72   | Receptor-like protein kinase-related family protein                          | AT3G22060.1      | 1.01              |
| 73   | FAD-binding berberine family protein                                         | AT5G44400.1      | 1.00              |
| 74   | ATIL1, Temperature-induced lipocalin                                         | AT5G58070.1      | 1.00              |
| 75   | ARO1, Aradillo repeat only 1                                                 | AT4G34940.1      | 1.00              |
| 76   | PSAD-2, Photosystem I subunit D-2                                            | AT1G03130.1      | 1.00              |
| 77   | TRAF-like family protein                                                     | AT1G58270.1      | 1.00              |
| 78   | Lipase/lipoxygenase, PLATLH2 family protein                                  | AT4G38730.1      | 1.00              |
| 79   | FAD-binding berberine family protein                                         | AT1G30700.1      | 1.00              |
| 80   | ATGR2, glutathione reductase                                                 | AT3G54660.1      | 0.99              |
| 81   | LHCb5, light harvesting complex of photosystem II                            | AT4G10340.1      | 0.99              |
| 82   | GTP binding elongation factor Tu family protein                              | AT4G02630.1      | 0.98              |
| 83   | Eukaryotic aspartyl protease family protein                                  | AT1G03220.1      | 0.96              |
| 84   | Glycosyl hydrolases family 32 protein                                        | AT1G62660.1      | 0.96              |
| 85   | MD-2-related lipid recognition domain-containing protein                     | AT5G23820.1      | 0.96              |
| 86   | DRT112, Cupredoxin superfamily protein                                       | AT1G20340.1      | 0.95              |
| 87   | Galactose mutarotase-like superfamily protein                                | AT3G47800.1      | 0.94              |
| 88   | CCD1, carotenoid cleavage dioxygenase 1                                      | AT3G63520.1      | 0.93              |
| 89   | CSD1, copper/zinc superoxide dismutase 1                                     | AT1G08830.1      | 0.93              |
| 90   | PSAA, Photosystem I, Psal/PSaB protein                                       | ATCG00350.1      | 0.93              |
| 91   | HAD superfamily, subfamily IIIB acid phosphatase                             | AT5G44020.1      | 0.92              |
| 92   | Alphabeta-Hydrolases superfamily protein                                     | AT1G27480.1      | 0.92              |
| 93   | Serine protease inhibitor (SERPIN) family protein                            | AT1G47710.1      | 0.91              |
| 94   | HAD superfamily, subfamily IIIB acid phosphatase                             | AT1G04040.1      | 0.90              |
| 95   | ATLL1, Triacylglycerol lipase-like 1                                         | AT1G45201.1      | 0.89              |
| 96   | TGG2 Triacylglycerol diacylglycerol 2                                        | AT3G02300.1      | 0.89              |
| 97   | Peroxisome superfamily protein                                               | AT1G71695.1      | 0.88              |
| 98   | IPP2, Isopentenyl pyrophosphate                                              | AT3G02780.1      | 0.87              |
| 99   | VSP1, Vegetative storage protein 1                                           | AT5G24780.1      | 0.86              |
| 100  | Cytosol aminopeptidase family protein                                        | AT4G30920.1      | 0.86              |
| 101  | AOC1, Allene oxide cyclase 1                                                 | AT3G25760.1      | 0.86              |
| 102  | Leucine-rich repeat (LRR) family protein                                     | AT1G33600.1      | 0.85              |
| 103  | Zn-dependent exopeptidases superfamily protein                               | AT5G04710.1      | 0.85              |
| 104  | PSAB, Photosystem I, Psal/PSaB protein                                       | ATCG00340.1      | 0.85              |
| 105  | ATOLH1, Chlorophyllase 1                                                     | AT1G19870.1      | 0.83              |
| 106  | Curculin-like lectin family protein                                          | AT1G78830.1      | 0.82              |
| 107  | ATPME3, Pectin methyltransferase 3                                           | AT3G14310.1      | 0.82              |
| 108  | MD-2-related lipid recognition domain-containing protein                     | AT3G44100.1      | 0.81              |
| 109  | PERO4, Peroxisome CB                                                         | AT3G49120.1      | 0.80              |
| 110  | Ribulose-bisphosphate carboxylases                                           | ATCG00490.1      | 0.80              |
| 111  | Subtilisin-like serine endopeptidase family protein                          | AT2G04160.1      | 0.79              |
| 112  | Dehydratase family                                                           | AT3G23940.1      | 0.78              |
| 113  | FAD-binding berberine family protein                                         | AT4G20830.1      | 0.76              |
| 114  | Dihydrodipicolyl dehydrogenases                                              | AT4G16155.1      | 0.76              |
| 115  | Subtilase family protein                                                     | AT3G14067.1      | 0.75              |
| 116  | Cytosol aminopeptidase family protein                                        | AT2G24200.1      | 0.74              |
| 117  | JAL23, Jacalin-related lectin Z3                                             | AT2G35330.1      | 0.73              |
| 118  | PETA, Photosynthetic electron transfer A                                     | ATCG00540.1      | 0.72              |
| 119  | PIP2B, Plasma membrane intrinsic protein 2                                   | AT2G37170.1      | 0.72              |
| 120  | COR3, Tyrosine transaminase family protein                                   | AT4G23600.1      | 0.72              |
| 121  | NIR1, Nitrite reductase 1                                                    | AT2G15620.1      | 0.71              |
| 122  | WRN1, HCPW1-1-interacting 1                                                  | AT1G80600.1      | 0.71              |
| 123  | TRAF-like family protein                                                     | AT3G28220.1      | 0.70              |
| 124  | AGT, Alanine glyoxylate aminotransferase                                     | AT2G13360.1      | 0.69              |
| 125  | Xylose isomerase family protein                                              | AT5G57655.2      | 0.69              |
| 126  | GSO1 (Leucine-rich repeat transmembrane protein kinase                       | AT4G20140.1      | 0.68              |
| 127  | Galactose mutarotase-like superfamily protein                                | AT4G25900.1      | 0.66              |
| 128  | PSBC, Photosystem II reaction center protein C                               | ATCG00280.1      | 0.65              |
| 129  | Leucine-rich repeat (LRR) family protein                                     | AT1G49750.1      | 0.65              |
| 130  | TGG2, Glucoside glucosylhydrolase 2                                          | AT5G25980.2      | 0.65              |
| 131  | Leucine-rich repeat (LRR) family protein                                     | AT1G33590.1      | 0.62              |
| 132  | Eukaryotic aspartyl protease family protein                                  | AT3G25200.1      | 0.61              |
| 133  | CAT3, Catalase 3                                                             | AT1G06260.1      | 0.59              |
| 134  | MD-2-related lipid recognition domain-containing protein                     | AT3G11780.1      | 0.50              |
| 135  | PETE1 Plastocyanin 1                                                         | AT1G76100.1      | 0.43              |
| 136  | TGG1, Thioglucoside glucosylhydrolase 1                                      | AT5G26000.1      | 0.43              |

**Table S1.** Arabidopsis proteins in frass from *T. ni* larvae reared at control versus elevated temperature. *T. ni* larvae were reared on WT Arabidopsis plants under CT or ET conditions as described in the main text. Arabidopsis proteins excreted in caterpillar frass (feces) were identified and quantified using a tandem-mass tag shotgun proteomics approach (see Methods). Listed are all Arabidopsis proteins showing increased (red) or decreased (green) abundance under ET compared to CT conditions.

| Rank | Protein annotation                                           | Accession Number | Fold change<br>(ET/CT) |
|------|--------------------------------------------------------------|------------------|------------------------|
| 1    | Lipase 3-like                                                | XP_026730869.1   | 6.63                   |
| 2    | Uncharacterized protein                                      | XP_026735425.1   | 4.20                   |
| 3    | Xanthine dehydrogenase-like                                  | XP_026741596.1   | 3.05                   |
| 4    | Alpha-amylase 1-like                                         | XP_026735018.1   | 2.86                   |
| 5    | Uncharacterized protein                                      | XP_026741374.1   | 2.60                   |
| 6    | Glucose dehydrogenase [FAD, quinone]-like                    | XP_026725148.1   | 2.56                   |
| 7    | Trypsin CFT-1-like                                           | XP_026736003.1   | 2.49                   |
| 8    | Collagenase-like                                             | XP_026730456.1   | 2.32                   |
| 9    | Lipase member H-like                                         | XP_026747853.1   | 2.25                   |
| 10   | Collagenase-like                                             | XP_026730556.1   | 2.19                   |
| 11   | Dihydrodipolysine-residue succinyltransferase                | XP_026734712.1   | 2.17                   |
| 12   | ATP synthase subunit alpha, mitochondrial                    | XP_026741163.1   | 2.08                   |
| 13   | Uncharacterized protein                                      | XP_026728305.1   | 2.06                   |
| 14   | Trypsin, alkaline C-like                                     | XP_026732818.1   | 1.96                   |
| 15   | CDKRAP3-like protein                                         | XP_026727222.1   | 1.92                   |
| 16   | Inactive pancreatic lipase-related protein 1-like            | XP_026731478.1   | 1.86                   |
| 17   | Collagenase-like                                             | XP_026730522.1   | 1.85                   |
| 18   | ATP synthase subunit beta, mitochondrial-like                | XP_026737421.1   | 1.80                   |
| 19   | Trypsin, alkaline C-like                                     | XP_026733377.1   | 1.79                   |
| 20   | Alpha-amylase 2-like                                         | XP_026741915.1   | 1.74                   |
| 21   | Pancreatic triacylglycerol lipase-like                       | XP_026733233.1   | 1.69                   |
| 22   | Uncharacterized protein                                      | XP_026732755.1   | 1.67                   |
| 23   | Uncharacterized protein                                      | XP_026730703.1   | 1.64                   |
| 24   | Trypsin, alkaline C-like                                     | XP_026739988.1   | 1.63                   |
| 25   | Uncharacterized protein                                      | XP_026726201.1   | 1.63                   |
| 26   | Pancreatic triacylglycerol lipase-like                       | XP_026731477.1   | 1.62                   |
| 27   | Zinc carboxypeptidase-like                                   | XP_026743018.1   | 1.59                   |
| 28   | Collagenase-like isoform X1                                  | XP_026730214.1   | 1.59                   |
| 29   | Uncharacterized protein                                      | XP_026728307.1   | 1.57                   |
| 30   | Midgut glutamate specific carboxypeptidase, partial          | AAS82585.1 (+1)  | 1.56                   |
| 31   | Collagenase-like isoform X1                                  | XP_026730441.1   | 1.56                   |
| 32   | Trypsin CFT-1-like                                           | XP_026739966.1   | 1.55                   |
| 33   | Uncharacterized protein                                      | XP_026729072.1   | 1.54                   |
| 34   | Cadherin                                                     | AEA29892.1 (+1)  | 1.53                   |
| 35   | Uncharacterized protein                                      | XP_026726462.1   | 1.50                   |
| 36   | Uncharacterized protein                                      | XP_026740026.1   | 1.49                   |
| 37   | Pancreatic lipase-related protein 2-like                     | XP_026747854.1   | 1.46                   |
| 38   | PggyBac transposable element-derived protein 3-like          | XP_026746698.1   | 1.46                   |
| 39   | Collagenase-like                                             | XP_026728548.1   | 1.45                   |
| 40   | Venom dipeptidyl peptidase 4-like isoform X1                 | XP_026746174.1   | 1.45                   |
| 41   | Uncharacterized protein                                      | XP_026733813.1   | 1.45                   |
| 42   | Alkaline phosphatase-like                                    | XP_026741480.1   | 1.45                   |
| 43   | Beta-1,3-glucan-binding protein-like                         | XP_026729328.1   | 1.43                   |
| 44   | Trypsin CFT-1-like isoform X1                                | XP_026739083.1   | 1.42                   |
| 45   | Pancreatic lipase-related protein 2-like                     | XP_026731490.1   | 1.40                   |
| 46   | Bradyrinin-like                                              | XP_026727844.1   | 1.39                   |
| 47   | Trypsin, alkaline B-like                                     | XP_026733144.1   | 1.39                   |
| 48   | Aldehyde oxidase 1-like                                      | XP_026741880.1   | 1.36                   |
| 49   | Alkaline phosphatase                                         | AEG79734.1       | 1.36                   |
| 50   | Trypsin, alkaline B-like                                     | XP_026739095.1   | 1.36                   |
| 51   | Uncharacterized protein                                      | XP_026735424.1   | 1.35                   |
| 52   | Trypsin, alkaline B-like                                     | XP_026739094.1   | 1.33                   |
| 53   | Collagenase-like                                             | XP_026730235.1   | 1.31                   |
| 54   | Azurocidin-like precursor protein                            | AAM46727.1       | 1.30                   |
| 55   | Carboxypeptidase B-like                                      | XP_026736474.1   | 1.30                   |
| 56   | Uncharacterized protein                                      | XP_026725494.1   | 1.29                   |
| 57   | Pancreatic triacylglycerol lipase-like                       | XP_026731590.1   | 1.27                   |
| 58   | Chymotrypsin-1-like                                          | XP_026741849.1   | 1.25                   |
| 59   | Glucosylceramidase-like                                      | XP_026747408.1   | 1.25                   |
| 60   | Lipase member H-like                                         | XP_026731597.1   | 1.24                   |
| 61   | Apoptotic chromatin condensation inducer in the nucleus-like | XP_026738550.1   | 1.24                   |
| 62   | Zinc carboxypeptidase-like                                   | XP_026743124.1   | 1.24                   |
| 63   | Chymotrypsin-2-like                                          | XP_026741847.1   | 1.23                   |
| 64   | Pancreatic lipase-related protein 2-like                     | XP_026747862.1   | 1.23                   |
| 65   | Midgut carboxypeptidase 1, partial                           | AAS82586.1 (+2)  | 1.23                   |
| 66   | Uncharacterized protein                                      | XP_026726105.1   | 1.22                   |
| 67   | Bradyrinin-like                                              | XP_026731127.1   | 1.21                   |
| 68   | Renin receptor                                               | XP_026731297.1   | 1.21                   |
| 69   | Pancreatic lipase-related protein 2-like                     | XP_026731672.1   | 1.21                   |
| 70   | Apyrase-like                                                 | XP_026728055.1   | 1.18                   |
| 71   | Transmembrane protease serine 9-like                         | XP_026730702.1   | 1.18                   |
| 72   | Cluster of xanthine dehydrogenase-like                       | XP_026741855.1   | 1.18                   |
| 73   | Lipase 3-like                                                | XP_026725377.1   | 1.15                   |
| 74   | Vanin-like protein 2 isoform X2                              | XP_026740921.1   | 1.13                   |
| 75   | Lipase 3-like                                                | XP_026730913.1   | 1.10                   |
| 76   | Pancreatic lipase-related protein 2-like                     | XP_026747863.1   | 1.09                   |
| 77   | Uncharacterized protein                                      | XP_026743063.1   | 1.08                   |
| 78   | Sphingomyelin phosphodiesterase 1-like                       | XP_026745062.1   | 1.08                   |
| 79   | Chymotrypsin-1-like                                          | XP_026741845.1   | 1.05                   |
| 80   | Serine protease 1-like                                       | XP_026746128.1   | 1.04                   |
| 81   | Cluster of lipase 1-like                                     | XP_026730901.1   | 1.02                   |
| 82   | Trypsin, alkaline C-like                                     | XP_026736002.1   | 1.01                   |
| 83   | Uncharacterized protein                                      | XP_026738773.1   | 1.00                   |
| 84   | Pancreatic lipase-related protein 2-like                     | XP_026740963.1   | 1.00                   |
| 85   | Uncharacterized protein                                      | XP_026726465.1   | 0.96                   |
| 86   | Achelase-1-like                                              | XP_026739079.1   | 0.96                   |
| 87   | XAA-Pro aminopeptidase ApepP-like                            | XP_026747928.1   | 0.96                   |
| 88   | patJ homolog                                                 | XP_026743074.1   | 0.95                   |
| 89   | Lipase 3-like                                                | XP_026739037.1   | 0.93                   |
| 90   | Pancreatic triacylglycerol lipase-like                       | XP_026740985.1   | 0.93                   |
| 91   | Trypsin, alkaline C-like                                     | XP_026739087.1   | 0.89                   |
| 92   | Aminopeptidase N3                                            | AAK39865.1 (+1)  | 0.89                   |
| 93   | Glucose dehydrogenase [FAD, quinone]-like                    | XP_026740327.1   | 0.88                   |
| 94   | Esterase B1-like                                             | XP_026744596.1   | 0.87                   |
| 95   | Histone H2B                                                  | XP_026746532.1   | 0.84                   |
| 96   | Membrane alanyl aminopeptidase-like                          | XP_026737522.1   | 0.83                   |
| 97   | Uncharacterized protein                                      | XP_026737525.1   | 0.83                   |
| 98   | Lipase member H-like                                         | XP_026733234.1   | 0.82                   |
| 99   | Gamma-glutamyl hydrolase A-like                              | XP_026731422.1   | 0.77                   |
| 100  | Uncharacterized protein                                      | XP_026734246.1   | 0.76                   |
| 101  | Aminopeptidase N2                                            | AAK39864.1 (+1)  | 0.74                   |
| 102  | Uncharacterized protein                                      | XP_026726460.1   | 0.74                   |
| 103  | Cluster of esterase FE4-like                                 | XP_026747801.1   | 0.73                   |
| 104  | Collagenase-like                                             | XP_026730342.1   | 0.68                   |
| 105  | Carboxypeptidase B-like                                      | XP_026736537.1   | 0.68                   |
| 106  | Uncharacterized protein                                      | XP_026734361.1   | 0.62                   |
| 107  | Uncharacterized protein                                      | XP_026730862.1   | 0.55                   |
| 108  | Glucose dehydrogenase [FAD, quinone]-like                    | XP_026735683.1   | 0.31                   |

**Table S2.** *Trichoplusia ni* proteins in frass from larvae reared at control versus elevated temperature. *T. ni* proteins excreted in caterpillar frass (feces) were identified and quantified using a tandem-mass tag shotgun proteomics approach (see Methods). Listed are all *T. ni* proteins showing increased (red) or decreased (green) abundance under ET compared to CT conditions.

Table S3. Oligonucleotide primers used in this study.

| Gene                               | AGI ID    | Primer name | Sequence (5'-3')          |
|------------------------------------|-----------|-------------|---------------------------|
| <i>VEGETATIVE STORAGE PROTEIN2</i> | AT5G24770 | VSP2F       | GTTAGGGACCGGAGCATCAACC    |
|                                    |           | VSP2R       | TCTTCCACAACCTCCAACGGTCACT |
| <i>LIPOXYGENASE 3</i>              | AT1G17420 | LOX3F       | GCTGGCGGTTTCGACATG        |
|                                    |           | LOX3R       | GCCATTCTCTGCGAATTAGA      |
| <i>PROTEIN PHOSPHATASE 2A</i>      | AT1G13320 | PP2AF       | AAGCAGCGTAATCGGTAGG       |
|                                    |           | PP2AR       | GCACAGCAATCGGGTATAAAG     |
